# Supplementary material
Source: MDPI journal article supplement (https://www.mdpi.com/1999-4907/14/3/641)
Supplement: s1 [file s1]

# Use of an Arboretum and DNA Barcoding for the Detection and Identification of Leaf-Mining Insects on Alien Woody Plants

Authors: Natalia I. Kirichenko, Stanislav Gomboc, Barbara Piškur, Maarten de Groot

**Table S2.** Diversity, abundance and trophic associations of leaf-mining insects documented on various woody plants in the Volčji Potok Arboretum (Gorenjska region, Slovenia) in the period 2022–2023.

| No. | Field No. | Plant species <sup>1</sup>                      | Damage level <sup>2</sup> | Insect taxon       |                |                                      | Sampling date |
|-----|-----------|-------------------------------------------------|---------------------------|--------------------|----------------|--------------------------------------|---------------|
|     |           |                                                 |                           | Order <sup>3</sup> | Family         | Species <sup>4</sup>                 |               |
| 1   | Slo-188-1 | <i>Acer campestre</i>                           | 1                         | Lep.               | Gracillariidae | <i>Caloptilia</i> sp.1               | 9.VIII.2022   |
| 2   | Slo-188-2 | <i>Acer campestre</i>                           | 1                         | Lep.               | Nepticulidae   | <i>Stigmella aceris</i>              | 9.VIII.2022   |
| 3   | Slo-184-1 | <i>Acer palmatum</i>                            | 1                         | Lep.               | Gracillariidae | <i>Caloptilia</i> sp.4               | 9.VIII.2022   |
| 4   | Slo-186-1 | <i>Acer pseudoplatanus</i> 'Simon-Louis Freres' | 1                         | Lep.               | Gracillariidae | <i>Caloptilia</i> sp.2               | 9.VIII.2022   |
| 5   | Slo-187-1 | <i>Acer pseudoplatanus</i> 'Simon-Louis Freres' | 1                         | Lep.               | Gracillariidae | <i>Caloptilia</i> sp.2               | 9.VIII.2022   |
| 6   | Slo-189-1 | <i>Acer saccharinum</i>                         | 1                         | Lep.               | Gracillariidae | <i>Caloptilia</i> sp.3               | 9.VIII.2022   |
| 7   | Slo-151-1 | <i>Aesculus glabra</i>                          | 1                         | Lep.               | Gracillariidae | <i>Cameraria ohridella</i> *         | 6.VIII.2022   |
| 8   | Slo-152-1 | <i>Aesculus glabra</i> var. <i>arguta</i>       | 2                         | Lep.               | Gracillariidae | <i>Cameraria ohridella</i>           | 6.VIII.2022   |
| 9   | Slo-152-2 | <i>Aesculus glabra</i> var. <i>arguta</i>       | 1                         | Lep.               | Nepticulidae   | <i>Stigmella</i> sp. 1               | 6.VIII.2022   |
| 10  | Slo-153-1 | <i>Aesculus glabra</i> var. <i>arguta</i>       | 3                         | Lep.               | Gracillariidae | <i>Cameraria ohridella</i> *         | 6.VIII.2022   |
| 11  | Slo-197-1 | <i>Betula pendula</i>                           | 1                         | Lep.               | Gracillariidae | <i>Phyllonorycter ulmifoliella</i>   | 9.VIII.2022   |
| 12  | Slo-197-2 | <i>Betula pendula</i>                           | 1                         | Lep.               | Gracillariidae | <i>Phyllonorycter corylifoliella</i> | 9.VIII.2022   |
| 13  | Slo-197-3 | <i>Betula pendula</i>                           | 1                         | Lep.               | Nepticulidae   | <i>Stigmella lapponica</i>           | 9.VIII.2022   |
| 14  | Slo-198-1 | <i>Betula utilis</i>                            | 1                         | Lep.               | Nepticulidae   | <i>Stigmella lapponica</i>           | 9.VIII.2022   |
| 15  | Slo-198-2 | <i>Betula utilis</i>                            | 1                         | Lep.               | Gracillariidae | <i>Parornix betulae</i>              | 9.VIII.2022   |
| 16  | Slo-199-1 | <i>Betula utilis</i> 'Doorenbos'                | 1                         | Lep.               | Gracillariidae | <i>Parornix betulae</i>              | 9.VIII.2022   |
| 17  | Slo-199-2 | <i>Betula utilis</i> 'Doorenbos'                | 1                         | Lep.               | Gracillariidae | <i>Caloptilia betulicola</i>         | 9.VIII.2022   |
| 18  | Slo-199-3 | <i>Betula utilis</i> 'Doorenbos'                | 1                         | Lep.               | Gracillariidae | <i>Phyllonorycter ulmifoliella</i>   | 9.VIII.2022   |
| 19  | Slo-199-4 | <i>Betula utilis</i> 'Doorenbos'                | 1                         | Lep.               | Nepticulidae   | <i>Stigmella lapponica</i>           | 9.VIII.2022   |
| 20  | Slo-182-1 | <i>Celtis julianae</i>                          | 1                         | Lep.               | Gracillariidae | <i>Phyllonorycter millierella</i>    | 9.VIII.2022   |
| 21  | Slo-182-2 | <i>Celtis julianae</i>                          | 1                         | Lep.               | Gracillariidae | <i>Caloptilia fidella</i>            | 9.VIII.2022   |
| 22  | Slo-175-1 | <i>Carpinus betulus</i>                         | 1                         | Lep.               | Nepticulidae   | <i>Stigmella microtheriella</i>      | 9.VIII.2022   |
| 23  | Slo-175-2 | <i>Carpinus betulus</i>                         | 1                         | Lep.               | Gracillariidae | <i>Parornix carpinella</i>           | 9.VIII.2022   |
| 24  | Slo-175-3 | <i>Carpinus betulus</i>                         | 1                         | Lep.               | Gracillariidae | <i>Phyllonorycter esperella</i>      | 9.VIII.2022   |
| 25  | Slo-175-4 | <i>Carpinus betulus</i>                         | 1                         | Lep.               | Gracillariidae | <i>Phyllonorycter tenerella</i>      | 9.VIII.2022   |
| 26  | Slo-175-5 | <i>Carpinus betulus</i>                         | 1                         | Lep.               | Nepticulidae   | <i>Stigmella flosclactiella</i>      | 9.VIII.2022   |
| 27  | Slo-201-1 | <i>Cotinus coggygria</i>                        | 2                         | Lep.               | Nepticulidae   | <i>Simplimorpha promissa</i>         | 9.VIII.2022   |
| 28  | Slo-154-1 | <i>Crataegus persimilis</i>                     | 1                         | Lep.               | Lyonetiidae    | <i>Lyonetia clerkella</i>            | 6.VIII.2022   |
| 29  | Slo-190-1 | <i>Fagus sylvatica</i> 'Asplenifolia'           | 1                         | Lep.               | Gracillariidae | <i>Phyllonorycter maestingella</i>   | 9.VIII.2022   |
| 30  | Slo-156-1 | <i>Fagus sylvatica</i> 'Cuprea'                 | 1                         | Lep.               | Gracillariidae | <i>Phyllonorycter maestingella</i>   | 6.VIII.2022   |

| No. | Field No.   | Plant species <sup>1</sup>                       | Damage level <sup>2</sup> | Insect taxon       |                |                                   | Sampling date |
|-----|-------------|--------------------------------------------------|---------------------------|--------------------|----------------|-----------------------------------|---------------|
|     |             |                                                  |                           | Order <sup>3</sup> | Family         | Species <sup>4</sup>              |               |
| 31  | Slo-156-2   | <i>Fagus sylvatica</i><br>'Cuprea'               | 1                         | Col.               | Curculionidae  | <i>Orchestes fagi</i>             | 6.VIII.2022   |
| 32  | Slo-156-3   | <i>Fagus sylvatica</i><br>'Cuprea'               | 2                         | Lep.               | Nepticulidae   | <i>Stigmella tityrella</i>        | 6.VIII.2022   |
| 33  | Slo-160-1   | <i>Fraxinus excelsior</i>                        | 2                         | Lep.               | Gracillariidae | <i>Caloptilia cuculipennella</i>  | 6.VIII.2022   |
| 34  | Slo-150-1   | <i>Juglans regia</i>                             | 2                         | Lep.               | Gracillariidae | <i>Caloptilia roscipennella</i>   | 6.VIII.2022   |
| 35  | Slo-161-1   | <i>Juglans regia</i>                             | 1                         | Lep.               | Gracillariidae | <i>Caloptilia roscipennella</i>   | 6.VIII.2022   |
| 36  | Slo-158-1   | <i>Malus floribunda</i>                          | 1                         | Lep.               | Gracillariidae | <i>Phyllonorycter</i> sp. 1       | 6.VIII.2022   |
| 37  | Slo-158-2   | <i>Malus floribunda</i>                          | 1                         | Lep.               | Gracillariidae | <i>Callisto denticulella</i>      | 6.VIII.2022   |
| 38  | Slo-158-3   | <i>Malus floribunda</i>                          | 1                         | Lep.               | Lyonetiidae    | <i>Lyonetia clerkella</i>         | 6.VIII.2022   |
| 39  | Slo-157-1   | <i>Malus floribunda</i><br>'Atropurpurea'        | 1                         | Lep.               | Gracillariidae | <i>Callisto denticulella</i>      | 6.VIII.2022   |
| 40  | Slo-157-2   | <i>Malus floribunda</i><br>'Atropurpurea'        | 1                         | Lep.               | Lyonetiidae    | <i>Leucoptera malifoliella</i>    | 6.VIII.2022   |
| 41  | Slo-164-1   | <i>Malus × scheideckeri</i><br>'Red Jade'        | 1                         | Lep.               | Gracillariidae | <i>Callisto denticulella</i>      | 6.VIII.2022   |
| 42  | Slo-164-2   | <i>Malus × scheideckeri</i><br>'Red Jade'        | 1                         | Lep.               | Lyonetiidae    | <i>Leucoptera malifoliella</i>    | 6.VIII.2022   |
| 43  | Slo-164-3   | <i>Malus × scheideckeri</i><br>'Red Jade'        | 1                         | Lep.               | Lyonetiidae    | <i>Lyonetia clerkella</i>         | 6.VIII.2022   |
| 44  | Slo-164-4   | <i>Malus × scheideckeri</i><br>'Red Jade'        | 1                         | Lep.               | Gracillariidae | <i>Phyllonorycter</i> sp. 1       | 6.VIII.2022   |
| 45  | Slo-164-5   | <i>Malus × scheideckeri</i><br>'Red Jade'        | 1                         | Lep.               | Nepticulidae   | <i>Stigmella incognitella</i>     | 6.VIII.2022   |
| 46  | Slo-165-1   | <i>Malus tschonoskii</i>                         | 1                         | Lep.               | Gracillariidae | <i>Phyllonorycter</i> sp. 1       | 6.VIII.2022   |
| 47  | Slo-165-2   | <i>Malus tschonoskii</i>                         | 1                         | Lep.               | Lyonetiidae    | <i>Lyonetia clerkella</i>         | 6.VIII.2022   |
| 48  | Slo-149-1   | <i>Phyllostachys</i><br><i>viridiglaucescens</i> | 1                         | Dip.               | Agromyzidae    | <i>Cerodontha unisetiorbita</i>   | 9.VIII.2022   |
| 49  | Slo-194-1   | <i>Phyllostachys</i><br><i>viridiglaucescens</i> | 1                         | Dip.               | Agromyzidae    | <i>Cerodontha unisetiorbita</i>   | 9.VIII.2022   |
| 50  | Slo-149-bis | <i>Platanus × acerifolia</i>                     | 2                         | Lep.               | Gracillariidae | <i>Phyllonorycter platani</i>     | 6.VIII.2022   |
| 51  | Slo-172-1   | <i>Platanus orientalis</i>                       | 2                         | Lep.               | Gracillariidae | <i>Phyllonorycter platani</i>     | 9.VIII.2022   |
| 52  | Slo-206-1   | <i>Populus alba</i>                              | 3                         | Lep.               | Gracillariidae | <i>Phyllonorycter comparella</i>  | 9.VIII.2022   |
| 53  | Slo-206-2   | <i>Populus alba</i>                              | 2                         | Lep.               | Gracillariidae | <i>Phyllocnistis xenia</i>        | 9.VIII.2022   |
| 54  | Slo-206-3   | <i>Populus alba</i>                              | 1                         | Lep.               | Gracillariidae | <i>Caloptilia stigmatella</i>     | 9.VIII.2022   |
| 55  | Slo-196-1   | <i>Populus nigra</i>                             | 1                         | Lep.               | Gracillariidae | <i>Phyllocnistis unipunctella</i> | 9.VIII.2022   |
| 56  | Slo-196-2   | <i>Populus nigra</i>                             | 1                         | Lep.               | Nepticulidae   | <i>Stigmella trimaculella</i>     | 9.VIII.2022   |
| 57  | Slo-183-2   | <i>Prunus cerasifera</i><br>'Nigra'              | 1                         | Lep.               | Gracillariidae | <i>Parornix finitimella</i>       | 9.VIII.2022   |
| 58  | Slo-183-1   | <i>Prunus cerasifera</i><br>'Nigra'              | 1                         | Lep.               | Nepticulidae   | <i>Stigmella plagiolella</i>      | 9.VIII.2022   |
| 59  | Slo-159-1   | <i>Prunus incisa</i><br>'February Pink'          | 1                         | Lep.               | Lyonetiidae    | <i>Lyonetia clerkella</i>         | 6.VIII.2022   |
| 60  | Slo-267-1   | <i>Prunus laurocerasus</i>                       | 1                         | Lep.               | Lyonetiidae    | <i>Lyonetia clerkella</i>         | 5.I.2023      |
| 61  | Slo-148-2   | <i>Pterocarya</i><br><i>fraxinifolia</i>         | 2                         | Lep.               | Gracillariidae | <i>Caloptilia roscipennella</i>   | 5.VIII.2022   |
| 62  | Slo-148-1a  | <i>Pterocarya</i><br><i>fraxinifolia</i>         | 2                         | Lep.               | Heliozelidae   | <i>Coptodisca lucifluella</i> *   | 5.VIII.2022   |

| No. | Field No.  | Plant species <sup>1</sup>                  | Damage level <sup>2</sup> | Insect taxon       |                 |                                      | Sampling date |
|-----|------------|---------------------------------------------|---------------------------|--------------------|-----------------|--------------------------------------|---------------|
|     |            |                                             |                           | Order <sup>3</sup> | Family          | Species <sup>4</sup>                 |               |
| 63  | Slo-195-2  | <i>Pterocarya fraxinifolia</i>              | ①                         | Lep.               | Gracillariidae  | <i>Caloptilia roscipennella</i>      | 9.VIII.2022   |
| 64  | Slo-148-1b | <i>Pterocarya fraxinifolia</i>              | ②                         | Lep.               | Heliozelidae    | <i>Coptodisca lucifluella</i> *      | 5.VIII.2022   |
| 65  | Slo-171-1  | <i>Pterocarya</i> sp.                       | ①                         | Lep.               | Heliozelidae    | <i>Coptodisca lucifluella</i>        | 9.VIII.2022   |
| 66  | Slo-195-1  | <i>Pterocarya fraxinifolia</i>              | ①                         | Lep.               | Heliozelidae    | <i>Coptodisca lucifluella</i>        | 9.VIII.2022   |
| 67  | Slo-181-1  | <i>Quercus ilex</i>                         | ①                         | Lep.               | Bucculatricidae | <i>Bucculatrix</i> sp.               | 9.VIII.2022   |
| 68  | Slo-180-1  | <i>Quercus libani</i>                       | ①                         | Lep.               | Gracillariidae  | <i>Phyllonorycter distentella</i> *  | 9.VIII.2022   |
| 69  | Slo-180-2  | <i>Quercus libani</i>                       | ①                         | Lep.               | Gracillariidae  | <i>Caloptilia alchimiella</i>        | 9.VIII.2022   |
| 70  | Slo-180-3  | <i>Quercus libani</i>                       | ①                         | Lep.               | Gracillariidae  | <i>Acrocercops brongniardella</i>    | 9.VIII.2022   |
| 71  | Slo-179-1  | <i>Quercus robur</i> 'Strypemonde'          | ①                         | Lep.               | Gracillariidae  | <i>Phyllonorycter distentella</i>    | 9.VIII.2022   |
| 72  | Slo-179-2  | <i>Quercus robur</i> 'Strypemonde'          | ①                         | Col.               | Curculionidae   | <i>Orchestes quercus</i>             | 9.VIII.2022   |
| 73  | Slo-179-3  | <i>Quercus robur</i> 'Strypemonde'          | ①                         | Lep.               | Bucculatricidae | <i>Bucculatrix</i> sp.               | 9.VIII.2022   |
| 74  | Slo-255-1  | <i>Rhododendron</i> sp.                     | ②                         | Lep.               | Gracillariidae  | <i>Caloptilia azaleella</i> *        | 5.I.2023      |
| 75  | Slo-192-1  | <i>Robinia pseudoacacia</i> 'Frisia'        | ①                         | Lep.               | Gracillariidae  | <i>Parectopa robiniella</i>          | 9.VIII.2022   |
| 76  | Slo-155-1  | <i>Robinia pseudoacacia</i> 'Umbraculifera' | ①                         | Lep.               | Gracillariidae  | <i>Parectopa robiniella</i>          | 6.VIII.2022   |
| 77  | Slo-155-2  | <i>Robinia pseudoacacia</i> 'Umbraculifera' | ①                         | Lep.               | Gracillariidae  | <i>Macrosaccus robiniella</i>        | 6.VIII.2022   |
| 78  | Slo-162-1  | <i>Robinia pseudoacacia</i> 'Umbraculifera' | ①                         | Lep.               | Gracillariidae  | <i>Macrosaccus robiniella</i>        | 6.VIII.2022   |
| 79  | Slo-192-2  | <i>Robinia pseudoacacia</i> 'Frisia'        | ①                         | Lep.               | Gracillariidae  | <i>Macrosaccus robiniella</i>        | 9.VIII.2022   |
| 80  | Slo-191-1  | <i>Robinia pseudoacacia</i> 'Tortuosa'      | ①                         | Lep.               | Gracillariidae  | <i>Parectopa robiniella</i>          | 9.VIII.2022   |
| 81  | Slo-191-2  | <i>Robinia pseudoacacia</i> 'Tortuosa'      | ①                         | Lep.               | Gracillariidae  | <i>Macrosaccus robiniella</i>        | 9.VIII.2022   |
| 82  | Slo-203-1  | <i>Salix acutifolia</i>                     | ①                         | Lep.               | Gracillariidae  | <i>Phyllocnistis valentinensis</i>   | 9.VIII.2022   |
| 83  | Slo-203-2  | <i>Salix acutifolia</i>                     | ②                         | Lep.               | Gracillariidae  | <i>Phyllocnistis ramulicola</i>      | 9.VIII.2022   |
| 84  | Slo-203-3  | <i>Salix acutifolia</i>                     | ①                         | Lep.               | Gracillariidae  | <i>Phyllonorycter pastorella</i>     | 9.VIII.2022   |
| 85  | Slo-168-1  | <i>Salix alba</i> 'Aurea'                   | ②                         | Lep.               | Gracillariidae  | <i>Phyllocnistis ramulicola</i> *    | 6.VIII.2022   |
| 86  | Slo-168-2  | <i>Salix alba</i> 'Aurea'                   | ②                         | Lep.               | Gracillariidae  | <i>Phyllonorycter pastorella</i>     | 6.VIII.2022   |
| 87  | Slo-169-1  | <i>Salix alba</i> 'Aurea'                   | ③                         | Lep.               | Gracillariidae  | <i>Phyllocnistis ramulicola</i>      | 6.VIII.2022   |
| 88  | Slo-169-2  | <i>Salix alba</i> 'Aurea'                   | ①                         | Lep.               | Nepticulidae    | <i>Stigmella salicis</i>             | 6.VIII.2022   |
| 89  | Slo-169-3  | <i>Salix alba</i> 'Aurea'                   | ②                         | Lep.               | Gracillariidae  | <i>Caloptilia stigmatella</i>        | 6.VIII.2022   |
| 90  | Slo-200-1  | <i>Salix alba</i> 'Fantasia'                | ②                         | Lep.               | Gracillariidae  | <i>Phyllocnistis ramulicola</i>      | 9.VIII.2022   |
| 91  | Slo-200-2  | <i>Salix alba</i> 'Fantasia'                | ①                         | Lep.               | Gracillariidae  | <i>Phyllocnistis valentinensis</i> * | 9.VIII.2022   |
| 92  | Slo-200-3  | <i>Salix alba</i> 'Fantasia'                | ①                         | Lep.               | Gracillariidae  | <i>Phyllocnistis saligna</i>         | 9.VIII.2022   |

| No. | Field No. | Plant species <sup>1</sup>           | Damage level <sup>2</sup> | Insect taxon       |                |                                        | Sampling date |
|-----|-----------|--------------------------------------|---------------------------|--------------------|----------------|----------------------------------------|---------------|
|     |           |                                      |                           | Order <sup>3</sup> | Family         | Species <sup>4</sup>                   |               |
| 93  | Slo-207-2 | <i>Salix alba</i> 'Strachowo'        | ①                         | Lep.               | Gracillariidae | <i>Phyllocnistis valentinensis</i>     | 9.VIII.2022   |
| 94  | Slo-207-3 | <i>Salix alba</i> 'Strachowo'        | ①                         | Lep.               | Gracillariidae | <i>Phyllonorycter pastorella</i>       | 9.VIII.2022   |
| 95  | Slo-205-1 | <i>Salix cinerea</i> 'Veitshöchheim' | ①                         | Lep.               | Gracillariidae | <i>Caloptilia stigmatella</i> *        | 9.VIII.2022   |
| 96  | Slo-202-3 | <i>Salix cinerea</i> 'Veitshöchheim' | ①                         | Lep.               | Gracillariidae | <i>Phyllonorycter salicicolella</i>    | 9.VIII.2022   |
| 97  | Slo-202-4 | <i>Salix cinerea</i> 'Veitshöchheim' | ①                         | Lep.               | Gracillariidae | <b><u>Phyllocnistis ramulicola</u></b> | 9.VIII.2022   |
| 98  | Slo-167-1 | <i>Salix × fragilis</i>              | ②                         | Lep.               | Gracillariidae | <i>Phyllocnistis valentinensis</i> *   | 6.VIII.2022   |
| 99  | Slo-167-3 | <i>Salix × fragilis</i>              | ②                         | Lep.               | Gracillariidae | <i>Phyllonorycter pastorella</i>       | 6.VIII.2022   |
| 100 | Slo-202-1 | <i>Salix × fragilis</i>              | ①                         | Lep.               | Gracillariidae | <i>Phyllocnistis valentinensis</i>     | 9.VIII.2022   |
| 101 | Slo-202-2 | <i>Salix × fragilis</i>              | ①                         | Lep.               | Gracillariidae | <b><u>Phyllocnistis ramulicola</u></b> | 9.VIII.2022   |
| 102 | Slo-202-4 | <i>Salix × fragilis</i>              | ①                         | Dip.               | Agromyzidae    | <i>Agromyza albitarsis</i>             | 9.VIII.2022   |
| 103 | Slo-170-1 | <i>Salix magnifica</i>               | ①                         | Lep.               | Gracillariidae | <i>Phyllonorycter salicicolella</i>    | 6.VIII.2022   |
| 105 | Slo-204-2 | <i>Salix pentandra</i>               | ①                         | Lep.               | Nepticulidae   | <i>Stigmella salicis</i>               | 9.VIII.2022   |
| 106 | Slo-204-3 | <i>Salix pentandra</i>               | ①                         | Hym.               | Tenthredinidae | <i>Heterarthrus</i> sp.                | 9.VIII.2022   |
| 107 | Slo-176-1 | <i>Tilia americana</i>               | ③                         | Lep.               | Gracillariidae | <b><u>Phyllonorycter issikii</u></b>   | 9.VIII.2022   |
| 104 | Slo-163-2 | <i>Tilia cordata</i>                 | ①                         | Col.               | Buprestidae    | <i>Trachys minutus</i>                 | 9.VIII.2022   |
| 108 | Slo-163-1 | <i>Tilia cordata</i>                 | ①                         | Lep.               | Gracillariidae | <b><u>Phyllonorycter issikii</u></b> * | 6.VIII.2022   |
| 109 | Slo-174-1 | <i>Tilia cordata</i>                 | ①                         | Lep.               | Gracillariidae | <b><u>Phyllonorycter issikii</u></b>   | 9.VIII.2022   |
| 110 | Slo-178-1 | <i>Tilia cordata</i>                 | ④                         | Lep.               | Gracillariidae | <b><u>Phyllonorycter issikii</u></b> * | 9.VIII.2022   |
| 111 | Slo-173-1 | <i>Tilia cordata</i> 'Firecracker'   | ①                         | Lep.               | Gracillariidae | <b><u>Phyllonorycter issikii</u></b>   | 9.VIII.2022   |
| 112 | Slo-177-1 | <i>Viburnum opulus</i>               | ①                         | Lep.               | Gracillariidae | <i>Phyllonorycter lantanella</i>       | 9.VIII.2022   |
| 113 | Slo-193-1 | <i>Viburnum rhytidophyllum</i>       | ①                         | Lep.               | Tortricidae    | <i>Acleris schalleriana</i>            | 9.VIII.2022   |

<sup>1</sup>Plant species: the lines with novel trophic associations are shaded in green color; <sup>2</sup>Damage level: ① – low (1–24% of leaves with mines per 100 leaves), ② – moderate (25–49%), ③ – high (50–75%), and ④ – severe infestation (> 75%). <sup>3</sup>Orders: Lep. – Lepidoptera, Col. – Coleoptera, Hym. – Hymenoptera, Dip. – Diptera. <sup>4</sup>Insect species: the species whose larvae or pupae were used for DNA barcoding are indicated by asterisk (\*); alien insect species for Slovenia are provided in bold in orange color (novel alien species are underlined); native species novel for Slovenia are given in black and bold and underlined.
