# Supplementary material
Source: MDPI journal article supplement (https://www.mdpi.com/1999-4907/14/3/641)
Supplement: s1 [file s1]

# Use of an Arboretum and DNA Barcoding for the Detection and Identification of Leaf-Mining Insects on Alien Woody Plants

Authors: Natalia I. Kirichenko, Stanislav Gomboc, Barbara Piškur, Maarten de Groot

**Table S1.** Origin of woody plant species involved in the study in the Volčji Potok Arboretum (Gorenjska region, Slovenia) in the period 2022–2023.

| No. | Plant taxon  |               |                                                    | Origin in Slovenia<br>(N – native,<br>A – alien) | Native range <sup>1</sup>                | Number of<br>examined<br>plants |
|-----|--------------|---------------|----------------------------------------------------|--------------------------------------------------|------------------------------------------|---------------------------------|
|     | Order        | Family        | Species                                            |                                                  |                                          |                                 |
| 1   | Sapindales   | Sapindaceae   | <i>Acer campestre</i>                              | N                                                | Europe                                   | 2                               |
| 2   | Sapindales   | Sapindaceae   | <i>Acer palmatum</i>                               | A                                                | E Asia, SE Russia                        | 1                               |
| 3   | Sapindales   | Sapindaceae   | <i>Acer pseudoplatanus</i><br>'Simon-Louis Freres' | N                                                | C Europe,<br>W Asia                      | 2                               |
| 4   | Sapindales   | Sapindaceae   | <i>Acer saccharinum</i>                            | A                                                | USA, SE Canada                           | 1                               |
| 5   | Sapindales   | Sapindaceae   | <i>Aesculus glabra</i>                             | A                                                | N America                                | 1                               |
| 6   | Sapindales   | Sapindaceae   | <i>Aesculus glabra</i> var.<br><i>arguta</i>       | A                                                | N America                                | 3                               |
| 7   | Fagales      | Betulaceae    | <i>Betula pendula</i>                              | N                                                | Europe, Asia                             | 3                               |
| 8   | Fagales      | Betulaceae    | <i>Betula utilis</i>                               | A                                                | W Himalayas                              | 2                               |
| 9   | Fagales      | Betulaceae    | <i>Betula utilis</i><br>'Doorenbos'                | A                                                | W Himalayas                              | 4                               |
| 10  | Fagales      | Betulaceae    | <i>Carpinus betulus</i>                            | N                                                | Europe, W Asia                           | 5                               |
| 11  | Rosales      | Cannabaceae   | <i>Celtis julianae</i>                             | A                                                | S China                                  | 2                               |
| 12  | Sapindales   | Anacardiaceae | <i>Cotinus coggygria</i>                           | N                                                | Eurasia                                  | 1                               |
| 13  | Rosales      | Rosaceae      | <i>Crataegus persimilis</i>                        | A                                                | USA, S Canada                            | 1                               |
| 14  | Fagales      | Fagaceae      | <i>Fagus sylvatica</i><br>'Asplenifolia'           | N                                                | Europe                                   | 1                               |
| 15  | Fagales      | Fagaceae      | <i>Fagus sylvatica</i><br>'Cuprea'                 | N                                                | Europe                                   | 3                               |
| 16  | Lamiales     | Oleaceae      | <i>Fraxinus excelsior</i>                          | N                                                | Europe, SW Asia                          | 1                               |
| 17  | Fagales      | Juglandaceae  | <i>Juglans regia</i>                               | A                                                | W and C Asia,<br>SW China                | 2                               |
| 18  | Rosales      | Rosaceae      | <i>Malus × scheideckeri</i><br>'Red Jade'          | A                                                | E Asia                                   | 5                               |
| 19  | Rosales      | Rosaceae      | <i>Malus floribunda</i>                            | A                                                | E Asia, incl.<br>Japan                   | 3                               |
| 20  | Rosales      | Rosaceae      | <i>Malus floribunda</i><br>'Atropurpurea'          | A                                                | E Asia, incl.<br>Japan                   | 2                               |
| 21  | Rosales      | Rosaceae      | <i>Malus tschonoskii</i>                           | A                                                | Japan                                    | 2                               |
| 22  | Poaceae      | Bambusoideae  | <i>Phyllostachys</i><br><i>viridiglaucescens</i>   | A                                                | China                                    | 20                              |
| 23  | Proteales    | Platanaceae   | <i>Platanus × acerifolia</i>                       | A                                                | Asia, N America                          | 1                               |
| 24  | Proteales    | Platanaceae   | <i>Platanus orientalis</i>                         | A                                                | Eurasia (from<br>the Balkans to<br>Iran) | 1                               |
| 25  | Malpighiales | Salicaceae    | <i>Populus alba</i>                                | N                                                | N Africa, C and S<br>Europe, C Asia      | 3                               |
| 26  | Malpighiales | Salicaceae    | <i>Populus nigra</i>                               | N                                                | Europe, SW and<br>C Asia, NW<br>Africa   | 2                               |
| 27  | Rosales      | Rosaceae      | <i>Prunus cerasifera</i><br>'Nigra'                | A                                                | SE Europe, W<br>Asia                     | 2                               |
| 28  | Rosales      | Rosaceae      | <i>Prunus incisa</i><br>'February Pink'            | A                                                | Japan                                    | 1                               |

| No. | Plant taxon  |              |                                             | Origin in Slovenia<br>(N – native,<br>A – alien) | Native range <sup>1</sup>     | Number of<br>examined<br>plants |
|-----|--------------|--------------|---------------------------------------------|--------------------------------------------------|-------------------------------|---------------------------------|
|     | Order        | Family       | Species                                     |                                                  |                               |                                 |
| 29  | Rosales      | Rosaceae     | <i>Prunus laurocerasus</i>                  | A                                                | SW Asia, SE Europe            | 1                               |
| 30  | Fagales      | Juglandaceae | <i>Pterocarya fraxinifolia</i>              | A                                                | Caucasian region              | 1                               |
| 31  | Fagales      | Fagaceae     | <i>Quercus ilex</i>                         | N                                                | Europe (Mediterranean region) | 1                               |
| 32  | Fagales      | Fagaceae     | <i>Quercus libani</i>                       | A                                                | W Asia                        | 3                               |
| 33  | Fagales      | Fagaceae     | <i>Quercus robur</i> 'Strypemonde'          | N                                                | Europe                        | 3                               |
| 34  | Ericales     | Ericaceae    | <i>Rhododendron</i> sp.                     | A                                                | Asia                          | 1                               |
| 35  | Fabales      | Fabaceae     | <i>Robinia pseudoacacia</i> 'Frisia'        | A                                                | N America                     | 2                               |
| 36  | Fabales      | Fabaceae     | <i>Robinia pseudoacacia</i> 'Tortuosa'      | A                                                | N America                     | 2                               |
| 37  | Fabales      | Fabaceae     | <i>Robinia pseudoacacia</i> 'Umbraculifera' | A                                                | N America                     | 3                               |
| 38  | Malpighiales | Salicaceae   | <i>Salix acutifolia</i>                     | A                                                | E Asia                        | 3                               |
| 39  | Malpighiales | Salicaceae   | <i>Salix alba</i> 'Aurea'                   | N                                                | Europe, W & C Asia            | 5                               |
| 40  | Malpighiales | Salicaceae   | <i>Salix alba</i> 'Fantasia'                | N                                                | Europe, W & C Asia            | 3                               |
| 41  | Malpighiales | Salicaceae   | <i>Salix alba</i> 'Strachowo'               | N                                                | Europe, W & C Asia            | 3                               |
| 42  | Malpighiales | Salicaceae   | <i>Salix cinerea</i> 'Veitshöchheim'        | N                                                | Europe, W Asia                | 2                               |
| 43  | Malpighiales | Salicaceae   | <i>Salix × fragilis</i>                     | N                                                | Europe, W Asia                | 5                               |
| 44  | Malpighiales | Salicaceae   | <i>Salix magnifica</i>                      | A                                                | SW China                      | 1                               |
| 45  | Malpighiales | Salicaceae   | <i>Salix pentandra</i>                      | N                                                | N Europe, N Asia              | 2                               |
| 46  | Malvales     | Malvaceae    | <i>Tilia americana</i>                      | A                                                | N America                     | 1                               |
| 47  | Malvales     | Malvaceae    | <i>Tilia cordata</i>                        | N                                                | Europe                        | 4                               |
| 48  | Malvales     | Malvaceae    | <i>Tilia cordata</i> 'Firecracker'          | N                                                | Europe                        | 1                               |
| 49  | Dipsacales   | Adoxaceae    | <i>Viburnum opulus</i>                      | N                                                | Europe, N Africa, C Asia      | 1                               |
| 50  | Dipsacales   | Adoxaceae    | <i>Viburnum rhytidophyllum</i>              | A                                                | Asia                          | 1                               |

<sup>1</sup>Native range: C Asia – Central Asia, C China – Central China, C Europe – Central Europe, E Asia – East Asia, N Africa – North Africa, N America – North America, NW Africa – Northwest Africa, S Canada – South Canada, S China – South China, S Europe – South Europe, SE Canada – Southeast Canada, SE Europe – Southeast Europe, SE Russia – Southeast Russia, SW Asia – Southwest Asia, SW China – Southwest China, W Asia – West Asia, W Himalayas – West Himalayas.
