# Supplementary material
Source: MDPI journal article supplement (https://www.mdpi.com/1999-4907/14/3/641)
Supplement: s1 [file s1]

# Use of an Arboretum and DNA Barcoding for the Detection and Identification of Leaf-Mining Insects on Alien Woody Plants

Authors: Natalia I. Kirichenko, Stanislav Gomboc, Barbara Piškur, Maarten de Groot

**Table S3.** Specimen data of leaf-mining insects collected in the Volčji Potok Arboretum (Gorenjska region, Slovenia) in the period 2022–2023 and DNA barcodes of the same species publicly available in BOLD, which were utilized for comparison in the present study\*.

| No.           | Process ID  | Species                                                                         | Life stage <sup>1</sup> | Host plant                             | Country  | Locality                | Collection date | Collectors               | GenBank accession | BIN          |
|---------------|-------------|---------------------------------------------------------------------------------|-------------------------|----------------------------------------|----------|-------------------------|-----------------|--------------------------|-------------------|--------------|
| ORIGINAL DATA |             |                                                                                 |                         |                                        |          |                         |                 |                          |                   |              |
| 1             | LPEST274-22 | <i>Cameraria ohridella</i>                                                      | L                       | <i>Aesculus glabra</i>                 | Slovenia | Arboretum Volcji Potok  | 06.VIII.2022    | N. Kirichenko, S. Gomboc | OQ413692          | BOLD:AAA1236 |
| 2             | LPEST275-22 | <i>Cameraria ohridella</i>                                                      | L                       | <i>Aesculus glabra</i>                 | Slovenia | Arboretum Volcji Potok  | 06.VIII.2022    | N. Kirichenko, S. Gomboc | OQ413699          | BOLD:AAA1236 |
| 3             | LPEST280-22 | parasitoid <i>Chrysocharis</i> sp. emerged from <i>Cerodontha unisetiorbita</i> | A*                      | <i>Phyllostachys viridiglaucescens</i> | Slovenia | Arboretum Volcji Potok  | 09.VIII.2022    | N. Kirichenko, S. Gomboc | OQ413691          | BOLD:ADD0996 |
| 4             | LPEST272-22 | <i>Coptodisca lucifluella</i>                                                   | L                       | <i>Pterocarya fraxinifolia</i>         | Slovenia | Arboretum Volcji Potok  | 06.VIII.2022    | N. Kirichenko, S. Gomboc | OQ413695          | BOLD:AAV9339 |
| 5             | LPEST271-22 | <i>Coptodisca lucifluella</i>                                                   | L                       | <i>Pterocarya fraxinifolia</i>         | Slovenia | Arboretum Volcji Potok  | 06.VIII.2022    | N. Kirichenko, S. Gomboc | OQ413706          | BOLD:AAV9339 |
| 6             | LPEST284-22 | <i>Coptodisca lucifluella</i>                                                   | L                       | <i>Juglans regia</i>                   | Slovenia | Skocjanske jame         | 09.VIII.2022    | N. Kirichenko, S. Gomboc | OQ413707          | BOLD:AAV9339 |
| 7             | LPEST250-22 | <i>Phyllocnistis labyrinthella</i>                                              | L                       | <i>Populus alba</i>                    | Slovenia | Arboretum Volcji Potok  | 09.VIII.2022    | N. Kirichenko, S. Gomboc | OQ413705          | BOLD:ACX5473 |
| 8             | LPEST279-22 | <i>Phyllocnistis ramulicola</i>                                                 | P                       | <i>Salix alba</i> 'Aurea'              | Slovenia | Arboretum Volcji Potok  | 06.VIII.2022    | N. Kirichenko, S. Gomboc | OQ413704          | BOLD:AAL5481 |
| 9             | LPEST161-22 | <i>Phyllocnistis saligna</i>                                                    | L                       | <i>Salix alba</i>                      | Slovenia | Triglavski Narodni Park | 24.VII.2022     | N. Kirichenko, S. Gomboc | OQ413708          | BOLD:AAQ1589 |
| 10            | LPEST185-22 | <i>Phyllocnistis saligna</i>                                                    | P                       | <i>Salix</i> sp.                       | Slovenia | Triglavski Narodni Park | 25.VII.2022     | N. Kirichenko, S. Gomboc | OQ413698          | BOLD:AAQ1589 |
| 11            | LPEST184-22 | <i>Phyllocnistis saligna</i>                                                    | P                       | <i>Salix</i> sp.                       | Slovenia | Triglavski Narodni Park | 25.VII.2022     | N. Kirichenko, S. Gomboc | OQ413700          | BOLD:AAQ1589 |

| No.                     | Process ID   | Species                            | Life stage <sup>1</sup> | Host plant                    | Country     | Locality               | Collection date | Collectors                     | GenBank accession | BIN          |
|-------------------------|--------------|------------------------------------|-------------------------|-------------------------------|-------------|------------------------|-----------------|--------------------------------|-------------------|--------------|
| 12                      | LPEST283-22  | <i>Phyllocnistis unipunctella</i>  | L                       | <i>Populus nigra</i>          | Slovenia    | Arboretum Volcji Potok | 09.VIII.2022    | N. Kirichenko, S. Gomboc       | OQ413693          | BOLD:AAD7979 |
| 13                      | LPEST192-22  | <i>Phyllocnistis valentinensis</i> | P                       | <i>Salix alba</i> 'Fantasia'  | Slovenia    | Arboretum Volcji Potok | 09.VIII.2022    | N. Kirichenko, S. Gomboc       | OQ413694          | BOLD:AAV4829 |
| 14                      | LPEST282-22  | <i>Phyllonorycter distentella</i>  | L                       | <i>Quercus libani</i>         | Slovenia    | Arboretum Volcji Potok | 05.VIII.2022    | N. Kirichenko, S. Gomboc       | OQ413696          | BOLD:AAF6169 |
| 15                      | LPEST281-22  | <i>Phyllonorycter issikii</i>      | L                       | <i>Tilia cordata</i>          | Slovenia    | Arboretum Volcji Potok | 05.VIII.2022    | N. Kirichenko, S. Gomboc       | OQ413702          | BOLD:AAC9940 |
| 16                      | LPEST276-22  | <i>Phyllonorycter issikii</i>      | L                       | <i>Tilia cordata</i>          | Slovenia    | Arboretum Volcji Potok | 06.VIII.2022    | N. Kirichenko, S. Gomboc       | OQ413703          | BOLD:AAC9940 |
| 17                      | LPEST278-22  | <i>Phyllonorycter pastorella</i>   | L                       | <i>Salix alba</i> 'Fantasia'  | Slovenia    | Arboretum Volcji Potok | 06.VIII.2022    | N. Kirichenko, S. Gomboc       | OQ413709          | BOLD:AAD9785 |
| DATA BORROWED FROM BOLD |              |                                    |                         |                               |             |                        |                 |                                |                   |              |
| 18                      | MICOW283-10  | <i>Cameraria ohridella</i>         | L                       | <i>Aesculus hippocastanum</i> | Greece      | Thessaly               | 06.VI.2008      | C. Lopez-Vaamonde, S. Augustin | HM379297          | BOLD:AAA1236 |
| 19                      | GBAH26688-19 | <i>Chrysocharis</i> sp. MV-2017    | —                       | —                             | Italy       | —                      | 20.VIII.2014    | —                              | KY973633          | BOLD:ADD0996 |
| 20                      | GBAH26689-19 | <i>Chrysocharis</i> sp. MV-2017    | —                       | —                             | Italy       | —                      | 20.VIII.2015    | —                              | KY973634          | BOLD:ADD0996 |
| 21                      | COPIN003-14  | <i>Coptodisca luciflua</i>         | A*                      | <i>Juglans regia</i>          | Italy       | Veneto                 | 05.X.2012       | P. Triberti                    | KJ427007          | BOLD:AAV9339 |
| 22                      | GRPAL1108-13 | <i>Phyllocnistis labyrinthella</i> | L                       | <i>Populus tremula</i>        | Russia      | Novosibirsk Oblast     | 13.VI.2012      | N. Kirichenko                  | MG191426          | BOLD:ACX5473 |
| 23                      | LEATH004-14  | <i>Phyllocnistis labyrinthella</i> | A                       | —                             | Italy       | South Tyrol            | 03.VI.2014      | P. Huemer                      | MW213495          | BOLD:ACX5473 |
| 24                      | LEAFN553-13  | <i>Phyllocnistis labyrinthella</i> | P                       | <i>Populus canescens</i>      | Netherlands | North Holland          | 02.IX.2012      | W. Ellis                       | MW212825          | BOLD:ACX5473 |
| 25                      | WOGRA324-15  | <i>Phyllocnistis labyrinthella</i> | A                       | <i>Populus alba</i>           | Netherlands | South Holland          | 08.X.2013       | C. Doorendeerd, W. Moerland    | MG191419          | BOLD:ACX5473 |
| 26                      | FGMLK172-17  | <i>Phyllocnistis labyrinthella</i> | A                       | —                             | Germany     | Bavaria                | 30.V.2015       | T. Guggemoos                   | MW213046          | BOLD:ACX5473 |
| 27                      | FGMLK178-17  | <i>Phyllocnistis saligna</i>       | A                       | —                             | Germany     | Bavaria                | 3.VI.2015       | T. Guggemoos                   | MW214600          | BOLD:AAQ1589 |
| 28                      | TIPSY384-12  | <i>Phyllocnistis saligna</i>       | A                       | —                             | Austria     | Kaernten               | 14.VII.2009     | C. Weizer                      | KX042733          | BOLD:AAQ1589 |

| No. | Process ID   | Species                            | Life stage <sup>1</sup> | Host plant                   | Country     | Locality                   | Collection date | Collectors                      | GenBank accession | BIN          |
|-----|--------------|------------------------------------|-------------------------|------------------------------|-------------|----------------------------|-----------------|---------------------------------|-------------------|--------------|
| 29  | WOGRA502-18  | <i>Phyllocnistis saligna</i>       | L                       | <i>Salix purpurea</i>        | Italy       | Piedmont                   | 30.IX.2018      | E.J. van Nieukerken             | MW212472          | BOLD:AAQ1589 |
| 30  | GRPAL1356-13 | <i>Phyllocnistis ramulicola</i>    | A*                      | <i>Salix melanopsis</i>      | Czech Rep.  | Brno                       | 30.X.2012       | A. Lastuvka                     | MW211847          | BOLD:AAL5481 |
| 31  | PHLAD379-11  | <i>Phyllocnistis ramulicola</i>    | A                       | —                            | France      | Provence-Alpes-Cote d'Azur | 02.X.2004       | J. Nel                          | KX042734          | BOLD:AAL5481 |
| 32  | GRPAL1357-13 | <i>Phyllocnistis ramulicola</i>    | A*                      | <i>Salix pentandra</i>       | Czech Rep.  | Brno                       | 30.X.2012       | A. Lastuvka                     | MW213069          | BOLD:AAL5481 |
| 33  | GRACI603-10  | <i>Phyllocnistis ramulicola</i>    | A*                      | <i>Salix cinerea</i>         | UK          | Hampshire                  | 05.IX.2009      | J. Langmaid                     | HM902824          | BOLD:AAL5481 |
| 34  | WOGRA491-18  | <i>Phyllocnistis ramulicola</i>    | L                       | <i>Salix atrocinerea</i>     | France      | Pays de la Loire           | 07.X.2017       | E.J. van Nieukerken, S. Richter | MW213719          | BOLD:AAL5481 |
| 35  | WOGRA455-17  | <i>Phyllocnistis unipunctella</i>  | A*                      | <i>Populus balsamifera</i>   | Russia      | Transbaikalia, Chita       | 11.VIII.2015    | N. Kirichenko                   | OQ413701          | BOLD:ACI4050 |
| 36  | MICRU040-15  | <i>Phyllocnistis unipunctella</i>  | L                       | <i>Populus x balsamifera</i> | Russia      | Buryatiya Rep.             | 10.VIII.2015    | N. Kirichenko                   | MG191424          | BOLD:ACI4050 |
| 37  | WOGRA422-16  | <i>Phyllocnistis unipunctella</i>  | L                       | <i>Populus</i>               | Japan       | Hokkaido-chiho             | 21.IX.2013      | C. Doorendeerd, C. van den Berg | OQ413697          | BOLD:ADA1533 |
| 38  | LEASV200-19  | <i>Phyllocnistis unipunctella</i>  | A                       | —                            | Austria     | Carinthia                  | 15.VIII.2018    | C. Wieser                       | MW214113          | BOLD:AAD7979 |
| 39  | WOGRA519-20  | <i>Phyllocnistis valentinensis</i> | L                       | <i>Salix alba</i>            | Netherlands | Gelderland                 | 12.IX.2019      | E.J. van Nieukerken             | MW214267          | BOLD:AAY4829 |
| 40  | GPRU043-21   | <i>Phyllocnistis valentinensis</i> | L                       | <i>Salix</i> sp.             | Slovenia    | Skocjanski zatok           | 29.IX.2019      | N. Kirichenko, S. Gomboc        | OP270616          | BOLD:AAY4829 |
| 41  | GRPAL1361-13 | <i>Phyllocnistis xenia</i>         | A*                      | <i>Populus alba</i>          | Czech Rep.  | Olomouc                    | 30.IX.2012      | A. Lastuvka                     | MW211910          | BOLD:ACX5473 |
| 42  | GRPAL1360-13 | <i>Phyllocnistis xenia</i>         | A*                      | <i>Populus alba</i>          | Slovakia    | Kuty                       | 30.IX.2012      | A. Lastuvka                     | MW211974          | BOLD:ACX5473 |
| 43  | GRSLO056-10  | <i>Phyllonorycter distentella</i>  | A                       | —                            | Slovenia    | Karst                      | 21.V.2004       | H. Deutsch                      | JF848207          | BOLD:AAF6169 |
| 44  | ISSIK317-14  | <i>Phyllonorycter issikii</i>      | A*                      | <i>Tilia maximowicziana</i>  | Japan       | Hokkaido                   | 13.IX.2014      | K. Tokashi                      | KX818397          | BOLD:AAC9940 |
| 45  | GRSLO514-11  | <i>Phyllonorycter pastorella</i>   | A                       | —                            | Austria     | Tyrol                      | 31-Mar-2005     | H. Deutsch                      | JN280339          | BOLD:AAD9785 |

| No.      | Process ID  | Species                  | Life stage <sup>1</sup> | Host plant                 | Country | Locality           | Collection date | Collectors    | GenBank accession | BIN          |
|----------|-------------|--------------------------|-------------------------|----------------------------|---------|--------------------|-----------------|---------------|-------------------|--------------|
| OUTGROUP |             |                          |                         |                            |         |                    |                 |               |                   |              |
| 46       | ISSIK127-14 | <i>Trachys minutus</i>   | L                       | <i>Salix fragilis</i>      | Russia  | Novosibirsk Oblast | 11.VII.2012     | N. Kirichenko | MH407687          | BOLD:AAO4465 |
| 47       | ISSIK131-14 | <i>Isochnus sequensi</i> | L                       | <i>Populus balsamifera</i> | Russia  | Krasnoyarsk Krai   | 17.VII.2011     | N. Kirichenko | MH407691          | BOLD:ACA3052 |

\* The process ID is provided for all specimens linking the records with the voucher specimen data in the BOLD database.

<sup>1</sup>Life stage: L – larva, P – pupa, A – adult (\*reared or found sealed in the leaf mine); — no data available.
